# Supplementary material for: Detailed Characterization of Small Extracellular Vesicles from Different Cell Types Based on Tetraspanin Composition by ExoView R100 Platform
Source: Int J Mol Sci. 2022 Aug 1;23(15):8544. doi: 10.3390/ijms23158544 (PMC9369185; doi:10.3390/ijms23158544)
Supplement: Supplementary file 1 [file ijms-23-08544-s001.zip › Table S1.xlsx]

## Sheet: Tabelle1
	Sample	capture spot	Size			Capture ratio	Colocalization [%]
			median [nm]	mean [nm]	SD [nm]	[%]	non-coloc	CD9/CD63	CD9/CD81	CD63/CD81	CD9/CD63/CD81
	cardiac fibroblasts	CD9	54.65	65.58	26.58	32.6	6.4	11.2	25.8	x	56.6
		CD63	52.97	56.04	11.02	34.5	8.8	12.7	x	31	47.5
		CD81	53.36	56.25	9.841	33	9	x	15.5	20.4	55.1
	foreskin fibroblasts	CD9	53.28	56.29	10.1	31	4.9	9.1	22.7	x	63.4
		CD63	52.79	54.85	8.591	31.2	7.1	11.3	x	28.8	52.8
		CD81	53.24	55.95	9.066	37.8	6.7	x	17.7	18.7	56.9
	lung fibroblasts	CD9	54.28	57.81	10.57	26.4	25.4	3.8	18.6	x	52.2
		CD63	53.95	57.61	11.99	38.5	42	7	x	18.1	32.9
		CD81	55.45	59.59	12.11	35.1	5.2	x	21.1	18.5	55.3
	HeLa	CD9	52.5	57.8	14.1	42.8	56.7	8.5	17.3	x	17.6
		CD63	52.9	60.2	18	36.2	17.1	50.7	x	16.3	15.8
		CD81	53.8	62.3	22.03	21	18.1	x	38.8	16.7	26.3
	HepG2	CD9	52.66	57.34	13.41	52.7	94.3	2.5	3.2	x	0
		CD63	51.91	55.73	12.2	39.1	56	36.5	x	7.3	0.2
		CD81	56.24	63.46	20.47	8.2	21	x	76.4	2.6	0
	H1650	CD9	55.33	60.51	15.33	71	45.8	12.6	28.9	x	12.6
		CD63	53.69	60.15	18.12	11.7	16.1	51	x	6.3	26.6
		CD81	54.93	61.5	18.08	17.3	2.1	x	73.9	2.2	21.9
	SH-SY5Y	CD9	53.96	58.15	11.89	30.5	29.5	9.4	26.8	x	34.3
		CD63	52.63	56.44	13.23	23.3	9.2	17.3	x	43.8	29.8
		CD81	53.99	58.62	13.15	46.1	22.8	x	20.4	28.3	28.5
	HMEC-1	CD9	54.66	58.05	10.52	49.8	29	10.1	24	x	37
		CD63	53.6	56.42	9.5	21.8	21.6	16.4	x	2.8	59.2
		CD81	54.19	56.71	8.758	28.3	1.5	x	37.6	4.2	56.8
	HUVEC	CD9	53.84	57.62	11.01	47.3	26.9	7.8	31.7	x	33.6
		CD63	52.51	54.79	8.875	20.4	39	10.8	x	4.2	46.1
		CD81	52.84	55.22	9.031	32.3	2.6	x	46.4	4.3	46.7
	hiPS A4	CD9	52.81	57.99	16.05	33.6	6.7	10	27.3	x	55.9
		CD63	54.07	63.15	23.43	28.8	11.3	15.8	x	11.6	61.4
		CD81	55.16	63.84	23.16	37.6	4	x	34.7	7.6	53.6
	hiPS CO2	CD9	52.3	56.65	12.18	28.7	12.8	11.8	29	x	46.5
		CD63	52	55.99	11.82	33.3	21	23.6	x	13.5	41.8
		CD81	53.61	58.98	14.52	37.9	3.3	x	37.1	8.2	51.5
	MSC (hPL)	CD9	53.09	57.57	13.05	38.2	78.1	2.8	7.6	x	11.6
		CD63	53.43	56.92	11.41	45	63.1	11.1	x	10.3	15.5
		CD81	52.78	56.58	12.23	16.7	5.2	x	29.4	19.4	45.9
	MSC (FCS)	CD9	53.77	58.69	14.96	31.2	49.2	3.2	18.4	x	29.2
		CD63	53.03	56.63	11.35	33.6	32.4	9.1	x	35.6	23
		CD81	54.19	58.05	12.89	35.2	10	x	21.2	35.4	33.5
	Table S1. Summary of all multi-dimensional data sets. This table provides an overview of all acquired parameters sorted by cell line and the respective capture spot. For determination of all size parameters the compiled data of three independent biological replicates was used. Capture ratio as well as Colocalization fractions are based on the mean of three independent biological replicates (each …
